# Supplementary material for: Synthesis, structures, and magnetic properties of butterfly-shaped hexanuclear [FeIII4LnIII2] single-molecule magnets
Source: Royal Society of Chemistry journal article supplement (doi:10.1039/d3ce00824j), 2023-01-01
Supplement: d3ce00824j1.pdf [file d3ce00824j1.pdf]

# Synthesis, Structures and Magnetic Properties of Butterfly-Shaped Hexanuclear [Fe<sup>III</sup><sub>4</sub>Ln<sup>III</sup><sub>2</sub>] Single-Molecule Magnets

## Supporting Information

Shujing Liu,<sup>a</sup> Chen Zou,<sup>a</sup> Hanjie Wang,<sup>a</sup> Sihuai Chen,<sup>\*a</sup> Jun Yuan<sup>\*a</sup> and

Lihui Jia<sup>\*a</sup>

<sup>a</sup>Key Laboratory for Green Chemistry Process of Ministry of Education, School of Chemistry and Environmental Engineering, Wuhan Institute of Technology, Guanggu 1st road 206, Donghu New & High Technology Development Zone, 430073 Wuhan, People's Republic of China. E-mail:

[sihuai\\_chen@wit.edu.cn](mailto:sihuai_chen@wit.edu.cn), [380332630@qq.com](mailto:380332630@qq.com), [jjalihui715@wit.edu.cn](mailto:jjalihui715@wit.edu.cn)

**Table S1** Crystal data and structure refinement for compounds **1** and **2**.

| Compound                                           | <b>1</b>                                                                                       | <b>2</b>                                                                                        |
|----------------------------------------------------|------------------------------------------------------------------------------------------------|-------------------------------------------------------------------------------------------------|
| Formula                                            | C <sub>30</sub> H <sub>72</sub> Y <sub>2</sub> Fe <sub>4</sub> N <sub>10</sub> O <sub>28</sub> | C <sub>30</sub> H <sub>72</sub> Dy <sub>2</sub> Fe <sub>4</sub> N <sub>10</sub> O <sub>28</sub> |
| <i>M<sub>r</sub></i>                               | 1550.36                                                                                        | 1697.54                                                                                         |
| Crystal system                                     | Triclinic                                                                                      | Triclinic                                                                                       |
| Space group                                        | <i>P</i> -1                                                                                    | <i>P</i> -1                                                                                     |
| <i>T</i> (K)                                       | 293                                                                                            | 296                                                                                             |
| <i>a</i> (Å)                                       | 10.823(3)                                                                                      | 11.053(12)                                                                                      |
| <i>b</i> (Å)                                       | 11.181(3)                                                                                      | 11.220(12)                                                                                      |
| <i>c</i> (Å)                                       | 12.933(4)                                                                                      | 13.170(14)                                                                                      |
| <i>α</i> (°)                                       | 79.54(3)                                                                                       | 80.21(3)                                                                                        |
| <i>β</i> (°)                                       | 79.91(2)                                                                                       | 80.56(3)                                                                                        |
| <i>γ</i> (°)                                       | 75.82(2)                                                                                       | 75.51(3)                                                                                        |
| <i>V</i> (Å <sup>3</sup> )                         | 1478(8)                                                                                        | 1546(3)                                                                                         |
| <i>Z</i>                                           | 1                                                                                              | 1                                                                                               |
| <i>D</i> <sub>calc</sub> (g cm <sup>-3</sup> )     | 1.742                                                                                          | 1.823                                                                                           |
| <i>F</i> (000)                                     | 800                                                                                            | 854                                                                                             |
| <i>μ</i> (mm <sup>-1</sup> )                       | 11.040                                                                                         | 3.392                                                                                           |
| Reflections collected                              | 5016                                                                                           | 5420                                                                                            |
| Unique reflections                                 | 5227                                                                                           | 5420                                                                                            |
| Parameters                                         | 365                                                                                            | 384                                                                                             |
| <i>R</i> <sub>1</sub> ( <i>I</i> > 2σ( <i>I</i> )) | 0.0783                                                                                         | 0.0354                                                                                          |
| <i>wR</i> <sub>2</sub> (all data)                  | 0.2218                                                                                         | 0.0632                                                                                          |
| <i>S</i> (all data)                                | 1.179                                                                                          | 1.066                                                                                           |

**Table S2** Selected bond distances (Å) and angles (deg) for compound **1**.

| Bond lengths (Å)  |            |             |            |             |          |
|-------------------|------------|-------------|------------|-------------|----------|
| Y1-Fe1            | 3.4445(17) | Y1-O9       | 2.378(7)   | Fe1-N3      | 2.209(9) |
| Y1-Fe1            | 3.4760(18) | Y1-O10      | 2.307(7)   | Fe2-O11     | 1.995(7) |
| Y1-O2             | 2.467(8)   | Y1-N1       | 2.879(9)   | Fe2-O12     | 1.924(7) |
| Y1-O3             | 2.640(9)   | Fe1-Y1      | 3.4759(18) | Fe2-O13     | 1.935(7) |
| Y1-O4             | 2.455(8)   | Fe1-O8      | 1.967(7)   | Fe2-O14     | 2.003(7) |
| Y1-O5             | 2.471(7)   | Fe1-O9      | 2.030(7)   | Fe2-N4      | 2.274(9) |
| Y1-O7             | 2.365(7)   | Fe1-O10     | 1.962(7)   | Fe2-N5      | 2.233(9) |
| Y1-O8             | 2.276(7)   | Fe1-O11     | 1.993(7)   | O9-Y1       | 2.377(7) |
| Y1-O9             | 2.445(7)   | Fe1-O14     | 1.985(7)   | O10-Fe1     | 1.962(7) |
| Bond angles (deg) |            |             |            |             |          |
| Fe1-Y1-Fe1        | 111.62(4)  | O9-Y1-O5    | 125.8(2)   | O12-Fe2-O13 | 147.3(3) |
| O2-Y1-Fe1         | 132.98(18) | O9-Y1-O5    | 141.1(2)   | O12-Fe2-O14 | 109.4(3) |
| O2-Y1-Fe1         | 75.81(19)  | O9-Y1-O9    | 72.5(3)    | O12-Fe2-N4  | 79.9(3)  |
| O2-Y1-O3          | 49.3(2)    | O9-Y1-N1    | 140.1(2)   | O12-Fe2-N5  | 87.8(3)  |
| O2-Y1-O5          | 67.8(3)    | O9-Y1-N1    | 146.7(2)   | O13-Fe2-O11 | 106.5(3) |
| O2-Y1-N1          | 65.9(3)    | O10-Y1-Fe1  | 32.31(18)  | O13-Fe2-O14 | 95.7(3)  |
| O3-Y1-Fe1         | 83.74(17)  | O10-Y1-Fe1  | 119.95(18) | O13-Fe2-N4  | 85.2(3)  |
| O3-Y1-Fe1         | 95.43(19)  | O10-Y1-O2   | 91.5(3)    | O13-Fe2-N5  | 80.6(3)  |
| O3-Y1-N1          | 93.8(3)    | O10-Y1-O3   | 126.0(3)   | O14-Fe2-N4  | 78.3(3)  |
| O4-Y1-Fe1         | 140.97(18) | O10-Y1-O4   | 128.0(2)   | O14-Fe2-N5  | 148.8(3) |
| O4-Y1-Fe1         | 106.18(17) | O10-Y1-O5   | 76.1(2)    | N5-Fe2-N4   | 131.5(3) |
| O4-Y1-O2          | 71.5(3)    | O10-Y1-O7   | 82.3(2)    | N2-O2-Y1    | 101.7(6) |
| O4-Y1-O3          | 79.1(3)    | O10-Y1-O9   | 84.7(2)    | N2-O3-Y1    | 94.2(6)  |
| O4-Y1-O5          | 51.9(2)    | O10-Y1-O9   | 65.3(2)    | N1-O4-Y1    | 95.9(6)  |
| O4-Y1-N1          | 26.0(2)    | O10-Y1-N1   | 102.0(3)   | N1-O5-Y1    | 95.3(6)  |
| O5-Y1-Fe1         | 96.13(17)  | N1-Y1-Fe1   | 129.60(18) | Y1-O7-H7A   | 127.4    |
| O5-Y1-Fe1         | 148.03(18) | N1-Y1-Fe1   | 118.71(18) | Y1-O7-H7B   | 126.5    |
| O5-Y1-O3          | 109.9(2)   | Y1-Fe1-Y1   | 68.38(4)   | Fe1-O8-Y1   | 108.3(3) |
| O5-Y1-N1          | 25.9(2)    | O8-Fe1-Y1   | 38.86(19)  | C1-O8-Y1    | 132.0(6) |
| O7-Y1-Fe1         | 112.80(18) | O8-Fe1-Y1   | 103.4(2)   | C1-O8-Fe1   | 115.9(6) |
| O7-Y1-Fe1         | 83.18(18)  | O8-Fe1-O9   | 82.3(3)    | Y1-O9-Y1    | 107.5(3) |
| O7-Y1-O2          | 138.8(3)   | O8-Fe1-O11  | 160.1(3)   | Y1-O9-H9    | 114.6    |
| O7-Y1-O3          | 151.6(3)   | O8-Fe1-O14  | 89.9(3)    | Y1-O9-H9    | 114.6    |
| O7-Y1-O4          | 80.5(3)    | O8-Fe1-N3   | 80.5(3)    | Fe1-O9-Y1   | 103.8(3) |
| O7-Y1-O5          | 71.2(2)    | O9-Fe1-Y1   | 41.6(2)    | Fe1-O9-Y1   | 100.2(3) |
| O7-Y1-O9          | 72.9(2)    | O9-Fe1-Y1   | 44.3(2)    | Fe1-O9-H9   | 114.6    |
| O7-Y1-O9          | 134.1(2)   | O9-Fe1-N3   | 148.8(3)   | Fe1-O10-Y1  | 108.7(3) |
| O7-Y1-N1          | 75.7(3)    | O10-Fe1-Y1  | 38.9(2)    | C5-O10-Y1   | 132.0(6) |
| O8-Y1-Fe1         | 32.82(18)  | O10-Fe1-Y1  | 86.2(2)    | C5-O10-Fe1  | 118.9(6) |
| O8-Y1-Fe1         | 139.27(19) | O10-Fe1-O8  | 103.6(3)   | Fe1-O11-Fe2 | 107.0(3) |
| O8-Y1-O2          | 112.9(3)   | O10-Fe1-O9  | 78.6(3)    | C6-O11-Fe1  | 132.2(6) |
| O8-Y1-O3          | 68.5(2)    | O10-Fe1-O11 | 93.7(3)    | C6-O11-Fe2  | 119.9(6) |

|           |           |             |          |             |          |
|-----------|-----------|-------------|----------|-------------|----------|
| O8-Y1-O4  | 74.8(2)   | O10-Fe1-O14 | 166.6(3) | C13-O12-Fe2 | 118.6(7) |
| O8-Y1-O5  | 124.3(2)  | O10-Fe1-N3  | 80.4(3)  | C10-O13-Fe2 | 117.7(6) |
| O8-Y1-O7  | 87.1(3)   | O11-Fe1-Y1  | 96.3(2)  | Fe1-O14-Fe2 | 107.0(3) |
| O8-Y1-O9  | 106.3(2)  | O11-Fe1-Y1  | 155.1(2) | C14-O14-Fe1 | 133.3(6) |
| O8-Y1-O9  | 67.6(2)   | O11-Fe1-O9  | 111.3(3) | C14-O14-Fe2 | 119.6(6) |
| O8-Y1-O10 | 152.3(3)  | O11-Fe1-N3  | 92.7(3)  | O4-N1-Y1    | 58.0(5)  |
| O8-Y1-N1  | 100.1(3)  | O14-Fe1-Y1  | 138.7(2) | O5-N1-Y1    | 58.7(5)  |
| O9-Y1-Fe1 | 35.46(16) | O14-Fe1-Y1  | 105.0(2) | O6-N1-Y1    | 174.5(7) |
| O9-Y1-Fe1 | 85.84(17) | O14-Fe1-O9  | 104.2(3) | C2-N3-Fe1   | 106.1(6) |
| O9-Y1-Fe1 | 34.56(17) | O14-Fe1-O11 | 73.0(3)  | C3-N3-Fe1   | 112.6(6) |
| O9-Y1-Fe1 | 84.16(16) | O14-Fe1-N3  | 101.7(3) | C4-N3-Fe1   | 104.7(6) |
| O9-Y1-O2  | 147.3(3)  | N3-Fe1-Y1   | 118.9(2) | C11-N4-Fe2  | 113.1(7) |
| O9-Y1-O2  | 76.4(3)   | N3-Fe1-Y1   | 111.7(2) | C12-N4-Fe2  | 104.1(7) |
| O9-Y1-O3  | 108.7(2)  | O11-Fe2-O14 | 72.6(3)  | C15-N4-Fe2  | 104.2(7) |
| O9-Y1-O3  | 69.6(3)   | O11-Fe2-N4  | 149.5(3) | C8-N5-Fe2   | 114.7(6) |
| O9-Y1-O4  | 134.4(2)  | O11-Fe2-N5  | 78.8(3)  | C9-N5-Fe2   | 104.6(6) |
| O9-Y1-O4  | 145.0(3)  | O12-Fe2-O11 | 101.0(3) | C7-N5-Fe2   | 102.9(6) |

**Table S3** Selected bond distances (Å) and angles (deg) for compound **2**.

| Bond lengths (Å)  |            |             |            |            |            |
|-------------------|------------|-------------|------------|------------|------------|
| Dy1-Dy1           | 3.947(3)   | Dy1-O9      | 2.475(5)   | Fe2-O6     | 2.023(3)   |
| Dy1-Fe1           | 3.477(3)   | Dy1-N5      | 2.904(5)   | Fe2-O3     | 2.015(3)   |
| Dy1-O2            | 2.286(3)   | Dy1-O11     | 2.764(6)   | Fe2-O5     | 1.935(4)   |
| Dy1-O7            | 2.415(4)   | Fe1-O2      | 1.984(3)   | Fe2-O4     | 1.927(4)   |
| Dy1-O7            | 2.459(4)   | Fe1-O7      | 2.043(4)   | Fe2-N2     | 2.253(4)   |
| Dy1-O1            | 2.314(3)   | Fe1-O1      | 1.988(3)   | Fe2-N1     | 2.299(5)   |
| Dy1-O8            | 2.399(4)   | Fe1-O6      | 2.010(4)   | O7-Dy1     | 2.415(4)   |
| Dy1-O12           | 2.485(4)   | Fe1-O3      | 2.001(3)   | O1-Dy1     | 2.314(3)   |
| Dy1-O13           | 2.484(4)   | Fe1-N3      | 2.222(4)   |            |            |
| Bond angles (deg) |            |             |            |            |            |
| Fe1-Dy1-Dy1       | 56.07(6)   | O12-Dy1-Dy1 | 149.16(9)  | O5-Fe2-O6  | 109.49(16) |
| O2-Dy1-Dy1        | 85.26(11)  | O12-Dy1-Fe1 | 148.18(9)  | O5-Fe2-O3  | 101.75(15) |
| O2-Dy1-Fe1        | 32.68(8)   | O12-Dy1-N5  | 25.83(11)  | O5-Fe2-N2  | 87.49(16)  |
| O2-Dy1-O7         | 104.70(13) | O12-Dy1-O11 | 109.31(13) | O5-Fe2-N1  | 79.44(16)  |
| O2-Dy1-O7         | 67.57(12)  | O13-Dy1-Dy1 | 159.29(8)  | O4-Fe2-O6  | 96.50(16)  |
| O2-Dy1-O1         | 152.88(11) | O13-Dy1-Fe1 | 104.83(10) | O4-Fe2-O3  | 106.69(16) |
| O2-Dy1-O8         | 88.98(13)  | O13-Dy1-O12 | 51.52(11)  | O4-Fe2-O5  | 145.97(15) |
| O2-Dy1-O12        | 124.58(13) | O13-Dy1-N5  | 25.75(11)  | O4-Fe2-N2  | 80.44(16)  |
| O2-Dy1-O13        | 74.29(13)  | O13-Dy1-O11 | 81.43(15)  | O4-Fe2-N1  | 85.41(16)  |
| O2-Dy1-O9         | 109.15(14) | O9-Dy1-Dy1  | 112.53(10) | N2-Fe2-N1  | 132.23(15) |
| O2-Dy1-N5         | 99.74(15)  | O9-Dy1-Fe1  | 130.47(11) | Fe1-O2-Dy1 | 108.85(15) |
| O2-Dy1-O11        | 67.80(12)  | O9-Dy1-O12  | 68.18(13)  | C1-O2-Dy1  | 132.5(3)   |
| O7-Dy1-Dy1        | 35.54(8)   | O9-Dy1-O13  | 72.31(15)  | C1-O2-Fe1  | 115.8(3)   |
| O7-Dy1-Dy1        | 36.30(9)   | O9-Dy1-N5   | 66.57(13)  | Dy1-O7-Dy1 | 108.16(14) |

|            |            |             |            |            |            |
|------------|------------|-------------|------------|------------|------------|
| O7-Dy1-Fe1 | 85.36(9)   | O9-Dy1-O11  | 46.87(14)  | Dy1-O7-H7  | 109(4)     |
| O7-Dy1-Fe1 | 35.27(8)   | N5-Dy1-Dy1  | 174.96(9)  | Dy1-O7-H7  | 125(4)     |
| O7-Dy1-O7  | 71.84(14)  | N5-Dy1-Fe1  | 128.53(11) | Fe1-O7-Dy1 | 100.70(15) |
| O7-Dy1-O12 | 126.28(11) | O11-Dy1-Dy1 | 87.89(12)  | Fe1-O7-Dy1 | 103.73(15) |
| O7-Dy1-O12 | 142.84(12) | O11-Dy1-Fe1 | 83.60(10)  | Fe1-O7-H7  | 109(4)     |
| O7-Dy1-O13 | 146.94(14) | O11-Dy1-N5  | 94.59(15)  | Fe1-O1-Dy1 | 109.31(15) |
| O7-Dy1-O13 | 132.72(12) | O2-Fe1-Dy1  | 38.47(9)   | C5-O1-Dy1  | 132.4(3)   |
| O7-Dy1-O9  | 146.37(13) | O2-Fe1-O7   | 82.00(15)  | C5-O1-Fe1  | 117.9(3)   |
| O7-Dy1-O9  | 77.20(13)  | O2-Fe1-O1   | 102.82(14) | Fe1-O6-Fe2 | 106.09(15) |
| O7-Dy1-N5  | 141.31(12) | O2-Fe1-O6   | 90.21(14)  | C13-O6-Fe1 | 133.5(3)   |
| O7-Dy1-N5  | 146.35(12) | O2-Fe1-O3   | 161.11(13) | C13-O6-Fe2 | 120.3(3)   |
| O7-Dy1-O11 | 107.67(14) | O2-Fe1-N3   | 80.20(15)  | Fe1-O3-Fe2 | 106.76(14) |
| O7-Dy1-O11 | 68.34(14)  | O7-Fe1-Dy1  | 44.03(10)  | C6-O3-Fe1  | 132.5(3)   |
| O1-Dy1-Dy1 | 72.09(10)  | O7-Fe1-N3   | 148.84(15) | C6-O3-Fe2  | 119.5(3)   |
| O1-Dy1-Fe1 | 120.37(8)  | O1-Fe1-Dy1  | 86.99(10)  | N5-O12-Dy1 | 95.8(3)    |
| O1-Dy1-O7  | 85.31(12)  | O1-Fe1-O7   | 78.43(14)  | C12-O5-Fe2 | 118.8(3)   |
| O1-Dy1-O7  | 65.21(13)  | O1-Fe1-O6   | 166.96(13) | C9-O4-Fe2  | 118.0(3)   |
| O1-Dy1-O8  | 82.44(14)  | O1-Fe1-O3   | 93.42(13)  | N5-O13-Dy1 | 95.9(3)    |
| O1-Dy1-O12 | 77.07(12)  | O1-Fe1-N3   | 80.86(15)  | C3-N3-Fe1  | 113.6(3)   |
| O1-Dy1-O13 | 128.48(12) | O6-Fe1-Dy1  | 103.84(10) | C4-N3-Fe1  | 103.4(3)   |
| O1-Dy1-O9  | 93.55(14)  | O6-Fe1-O7   | 104.20(15) | C2-N3-Fe1  | 105.9(3)   |
| O1-Dy1-N5  | 102.91(14) | O6-e1-N3    | 101.24(16) | C18-N2-Fe2 | 104.3(3)   |
| O1-Dy1-O11 | 124.35(13) | O3-Fe1-Dy1  | 154.45(10) | C10-N2-Fe2 | 104.4(3)   |
| O8-Dy1-Dy1 | 104.03(10) | O3-Fe1-O7   | 111.07(15) | C8-N2-Fe2  | 114.7(3)   |
| O8-Dy1-Fe1 | 83.44(10)  | O3-Fe1-O6   | 73.66(13)  | N4-O9-Dy1  | 105.7(3)   |
| O8-Dy1-O7  | 73.26(13)  | O3-Fe1-N3   | 93.11(15)  | O12-N5-Dy1 | 58.3(2)    |
| O8-Dy1-O7  | 133.60(13) | N3-Fe1-Dy1  | 112.13(11) | O13-N5-Dy1 | 58.3(2)    |
| O8-Dy1-O12 | 72.17(12)  | O6-Fe2-N2   | 149.11(14) | O14-N5-Dy1 | 173.8(4)   |
| O8-Dy1-O13 | 79.31(15)  | O6-Fe2-N1   | 77.50(15)  | C11-N1-Fe2 | 104.1(3)   |
| O8-Dy1-O9  | 140.01(13) | O3-Fe2-O6   | 73.11(13)  | C14-N1-Fe2 | 104.1(3)   |
| O8-Dy1-N5  | 75.56(13)  | O3-Fe2-N2   | 78.36(14)  | C15-N1-Fe2 | 113.0(4)   |
| O8-Dy1-O11 | 153.15(14) | O3-Fe2-N1   | 149.20(14) | N4-O11-Dy1 | 92.5(4)    |

**Table S4** Dysprosium geometry analysis for compound **2** by using SHAPE 2.1 program (CShM = 2.76362).

| Point group | Geometry | Polyhedron                    | Dy     |
|-------------|----------|-------------------------------|--------|
| $D_{9h}$    | EP-9     | Enneagon                      | 32.219 |
| $C_{8v}$    | OPY-9    | Octagonal pyramid             | 20.958 |
| $D_{7h}$    | HBPY-9   | Heptagonal bipyramid          | 16.157 |
| $C_{3v}$    | JTC-9    | Johnson triangular cupola J3  | 15.190 |
| $C_{4v}$    | JCCU-9   | Capped cube J8                | 6.411  |
| $C_{4v}$    | CCU-9    | Spherical-relaxed capped cube | 5.150  |

|          |                |                                          |              |
|----------|----------------|------------------------------------------|--------------|
| $C_{4v}$ | JCSAPR-9       | Capped square antiprism J10              | 3.565        |
| $C_{4v}$ | <b>CSAPR-9</b> | <b>Spherical capped square antiprism</b> | <b>2.764</b> |
| $D_{3h}$ | JTCTPR-9       | Tricapped trigonal prism J51             | 4.587        |
| $D_{3h}$ | TCTPR-9        | Spherical tricapped trigonal prism       | 3.519        |
| $C_{3v}$ | JTDIC-9        | Tridiminished icosahedron J63            | 12.436       |
| $C_{2v}$ | HH-9           | Hula-hoop                                | 10.455       |
| $C_s$    | MFF-9          | Muffin                                   | 3.017        |

**Table S5** Fitting parameters from the least-square fitting of the Cole-Cole plots according to the generalized Debye model for compound **2** at  $H_{dc} = 1000$  Oe.

| Temperature/K | $\chi_s / \text{cm}^3 \text{mol}^{-1}$ | $\chi T / \text{cm}^3 \text{mol}^{-1}$ | $\alpha$ | R       |
|---------------|----------------------------------------|----------------------------------------|----------|---------|
| 2.0           | 0.73                                   | 22.08583                               | 0.41298  | 0.97019 |
| 3.0           | 0.64591                                | 8.63302                                | 0.53314  | 0.97127 |
| 4.0           | 0.46601                                | 4.71849                                | 0.55234  | 0.9634  |
| 5.0           | 0.37641                                | 3.67148                                | 0.47877  | 0.95384 |
| 6.0           | 0.33617                                | 3.07766                                | 0.41873  | 0.95677 |
| 7.0           | 0.31199                                | 2.66597                                | 0.38389  | 0.97225 |
| 8.0           | 0.28499                                | 2.35066                                | 0.36957  | 0.98124 |
| 9.0           | 0.26454                                | 2.1076                                 | 0.37458  | 0.98369 |
| 10.0          | 0.24294                                | 1.90747                                | 0.41128  | 0.98375 |
| 11.0          | 0.19732                                | 1.74862                                | 0.44236  | 0.98457 |
| 12.0          | 0.19687                                | 1.61265                                | 0.43303  | 0.98226 |
| 13.0          | 0.17508                                | 1.50144                                | 0.45777  | 0.97903 |
| 14.0          | 0.19447                                | 1.40374                                | 0.41117  | 0.97972 |
| 15.0          | 0.19621                                | 0.31967                                | 0.40134  | 0.98664 |
| 16.0          | 0.16203                                | 1.24183                                | 0.4211   | 0.98378 |
| 17.0          | 0.18239                                | 1.17435                                | 0.39101  | 0.97735 |
| 18.0          | 0.17127                                | 1.11556                                | 0.40802  | 0.98792 |
| 19.0          | 0.18443                                | 1.06243                                | 0.37012  | 0.97979 |
| 20.0          | 0.06935                                | 1.00561                                | 0.47234  | 0.98485 |

**Table S6** Fitting parameters from the least-square fitting of the Cole-Cole plots according to the generalized Debye model for compound **3** at  $H_{dc} = 0$  Oe.

| Temperature/K | $\chi_s / \text{cm}^3 \text{mol}^{-1}$ | $\chi T / \text{cm}^3 \text{mol}^{-1}$ | $\alpha$ | R       |
|---------------|----------------------------------------|----------------------------------------|----------|---------|
| 2.0           | 0.62835                                | 0.61487                                | -0.00789 | 0.99033 |
| 3.0           | 0.62351                                | 0.39893                                | 0.01698  | 0.99255 |
| 4.0           | 0.56108                                | 0.30107                                | 0.02725  | 0.94825 |
| 5.0           | 0.44605                                | 0.23558                                | 0.03359  | 0.95794 |
| 6.0           | 0.36527                                | 0.19514                                | 0.03222  | 0.97882 |
| 7.0           | 0.32930                                | 0.16814                                | 0.02829  | 0.99301 |
| 8.0           | 0.31877                                | 0.14896                                | 0.02517  | 0.98637 |
| 9.0           | 0.30352                                | 0.13446                                | 0.02230  | 0.98578 |
| 10.0          | 0.30314                                | 0.12414                                | 0.02206  | 0.98297 |

**Table S7** Comparison of compound **2** and **3** with other relevant clusters reported in literature.

| Complex                                                     | Coordination geometry of Dy <sup>III</sup> | $U_{\text{eff}}/K$ ( $H_{\text{dc}}$ ) | $\tau_0/s$                     | ref.      |
|-------------------------------------------------------------|--------------------------------------------|----------------------------------------|--------------------------------|-----------|
| Fe <sup>III</sup> <sub>4</sub> Dy <sub>2</sub> <sup>a</sup> | square antiprism                           | 21.4                                   | 2.7×10 <sup>-8</sup>           | 36        |
| Fe <sup>III</sup> <sub>4</sub> Dy <sub>4</sub> <sup>b</sup> | square antiprism                           | No SMM                                 |                                |           |
| Fe <sup>III</sup> <sub>4</sub> Dy <sub>2</sub> <sup>c</sup> | square antiprism                           | (18.4 ± 2.7)                           | (1.01 ± 0.89)×10 <sup>-7</sup> | 37        |
| Fe <sup>III</sup> <sub>4</sub> Dy <sub>4</sub> <sup>d</sup> | bicapped trigonal prism                    | 17.15                                  | 4.86×10 <sup>-6</sup>          | 38        |
| Fe <sup>III</sup> <sub>4</sub> Dy <sub>2</sub> <sup>e</sup> | muffin                                     | 1.2 (1000 Oe)                          | 7.4×10 <sup>-5</sup>           | 39        |
| Fe <sup>III</sup> <sub>6</sub> Dy <sub>2</sub>              | muffin                                     | 12.2 (1000 Oe)                         | 4.0×10 <sup>-5</sup>           |           |
| Fe <sup>III</sup> <sub>7</sub> Dy <sub>3</sub>              | square antiprism                           | 33.4                                   | 6.6×10 <sup>-8</sup>           | 40        |
| Fe <sup>III</sup> <sub>6</sub> Gd                           | triangular dodecahedron                    | No SMM                                 |                                | 41        |
| Fe <sub>4</sub> Dy <sub>2</sub> <sup>f</sup>                | 8-coordinate, C <sub>1</sub> symmetry      | 26.2                                   | 5.9×10 <sup>-5</sup>           | 42        |
| Fe <sub>4</sub> Y <sub>1.83</sub> Dy <sub>0.17</sub>        | 8-coordinate, C <sub>1</sub> symmetry      | 29.0 (1500 Oe)                         | 8.3×10 <sup>-5</sup>           |           |
| Fe <sup>III</sup> <sub>4</sub> Ln <sub>2</sub> <sup>g</sup> | square antiprism                           | No SMM                                 |                                | 50        |
| Fe <sup>III</sup> <sub>4</sub> Er <sub>2</sub>              | square antiprism                           | 12.8 (500 Oe)                          | 4.6×10 <sup>-7</sup>           | 51        |
| Fe <sup>III</sup> <sub>4</sub> Tb <sub>2</sub>              | 8-coordinate                               | (26.4 ± 0.4)                           | (1.2 ± 0.2)10 <sup>-9</sup>    | 54        |
| Fe <sup>III</sup> <sub>4</sub> Dy <sub>2</sub> <sup>h</sup> | 8-coordinate                               | No SMM                                 |                                |           |
| Fe <sup>III</sup> <sub>4</sub> Dy <sub>4</sub> <sup>i</sup> | triangular dodecahedron                    | 9.8                                    | 1.5×10 <sup>-7</sup>           | 57        |
| <b>2</b>                                                    | 9-coordinate, C <sub>1</sub> symmetry      | 39.7                                   | 1.7×10 <sup>-5</sup>           | This work |
| <b>3</b>                                                    | 9-coordinate, C <sub>1</sub> symmetry      | 101.5                                  | 5.6×10 <sup>-9</sup>           | This work |

<sup>a</sup> Fe<sup>III</sup><sub>4</sub>Dy<sub>2</sub> : [Fe<sub>4</sub>Dy<sub>2</sub>(μ<sub>3</sub>-OH)<sub>2</sub>(n-bdea)<sub>4</sub>(C<sub>6</sub>H<sub>5</sub>CO<sub>2</sub>)<sub>8</sub>]·MeCN

<sup>b</sup> Fe<sup>III</sup><sub>4</sub>Dy<sub>2</sub> : [Fe<sub>4</sub>Dy<sub>4</sub>(μ<sub>3</sub>-OH)<sub>4</sub>(n-bdea)<sub>4</sub>(O<sub>2</sub>CC<sub>6</sub>H<sub>4</sub>CH<sub>3</sub>)<sub>12</sub>]·MeCN

<sup>c</sup> Fe<sup>III</sup><sub>4</sub>Dy<sub>2</sub> : [Fe<sub>4</sub>Dy<sub>2</sub>(OH)<sub>2</sub>(N<sub>3</sub>)<sub>2</sub>(bdea)<sub>4</sub>(O<sub>2</sub>CCMe<sub>3</sub>)<sub>5</sub>(H<sub>2</sub>O)]NO<sub>3</sub>·2(EtOH)

<sup>d</sup> Fe<sup>III</sup><sub>4</sub>Dy<sub>4</sub> : [Fe<sup>III</sup><sub>4</sub>Ln<sup>III</sup><sub>4</sub>O<sub>2</sub>(OH)<sub>4</sub>(mosaoH)<sub>4</sub>(Piv)<sub>4</sub>(N-mdea)<sub>4</sub>(H<sub>2</sub>O)<sub>2</sub>]

<sup>e</sup> Fe<sup>III</sup><sub>4</sub>Dy<sub>2</sub> : [Fe<sub>4</sub>Dy<sub>2</sub>(L1)<sub>2</sub>(μ<sub>4</sub>-O)<sub>2</sub>(piv)<sub>4</sub>(H<sub>2</sub>O)<sub>2</sub>(NO<sub>3</sub>)<sub>4</sub>]·CH<sub>3</sub>CN·CH<sub>3</sub>OH { [2,2-((2-((2-hydroxyethyl)amino)cyclohexyl)azanediyl)bis(ethan-1-ol) (H3L1) ] }

Fe<sup>III</sup><sub>6</sub>Dy<sub>2</sub> : [Fe<sub>6</sub>Dy<sub>2</sub>(L1)<sub>2</sub>(μ<sub>4</sub>-O)<sub>2</sub>(CH<sub>3</sub>COO)<sub>6</sub>(OH)<sub>2</sub>(H<sub>2</sub>O)<sub>2</sub>(NO<sub>3</sub>)<sub>6</sub>]·CH<sub>3</sub>CN

Fe<sup>III</sup><sub>7</sub>Dy<sub>3</sub> : [Dy<sub>3</sub>Fe<sub>7</sub>(μ<sub>4</sub>-O)<sub>2</sub>(μ<sub>3</sub>-OH)<sub>2</sub>(mdea)<sub>7</sub>(μ-benzoate)<sub>4</sub>(N<sub>3</sub>)<sub>6</sub>]<sub>3</sub>·2H<sub>2</sub>O·7CH<sub>3</sub>OH

Fe<sup>III</sup><sub>6</sub>Gd : [Fe<sub>6</sub>Ln(μ<sub>3</sub>-OH)<sub>2</sub>(mdea)<sub>6</sub>(N<sub>3</sub>)<sub>6</sub>(NO<sub>3</sub>)<sub>2</sub>]

<sup>f</sup> Fe<sub>4</sub>Dy<sub>2</sub> : [Fe<sub>4</sub>Dy<sub>2</sub>(μ<sub>3</sub>-OH)<sub>2</sub>(mdea)<sub>6</sub>(SCN)<sub>2</sub>(NO<sub>3</sub>)<sub>2</sub>(H<sub>2</sub>O)<sub>2</sub>]·4H<sub>2</sub>O·2MeCN

Fe<sub>4</sub>Y<sub>1.83</sub>Dy<sub>0.17</sub> : [Fe<sub>4</sub>Y<sub>1.83</sub>Dy<sub>0.17</sub>(μ<sub>3</sub>-OH)<sub>2</sub>(mdea)<sub>6</sub>(SCN)<sub>2</sub>(NO<sub>3</sub>)<sub>2</sub>(H<sub>2</sub>O)<sub>2</sub>]·4H<sub>2</sub>O·2MeCN

<sup>g</sup> Fe<sup>III</sup><sub>4</sub>Ln<sub>2</sub> : [Fe<sup>III</sup><sub>4</sub>Ln<sup>III</sup><sub>2</sub>(μ<sub>4</sub>-O)<sub>2</sub>(Hedte)<sub>2</sub>(piv)<sub>6</sub>(NO<sub>3</sub>)<sub>2</sub>]·2MeCN·2CH<sub>2</sub>Cl<sub>2</sub> {Ln = Tb(**1**), Ho(**2**) and Er(**3**), where Hedte = *N,N,N,N'*-tetrakis-(2-hydroxyethyl)ethylenediamine; piv = pivalic acid}

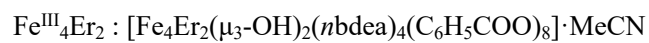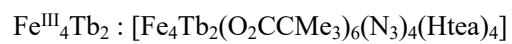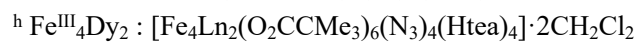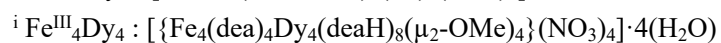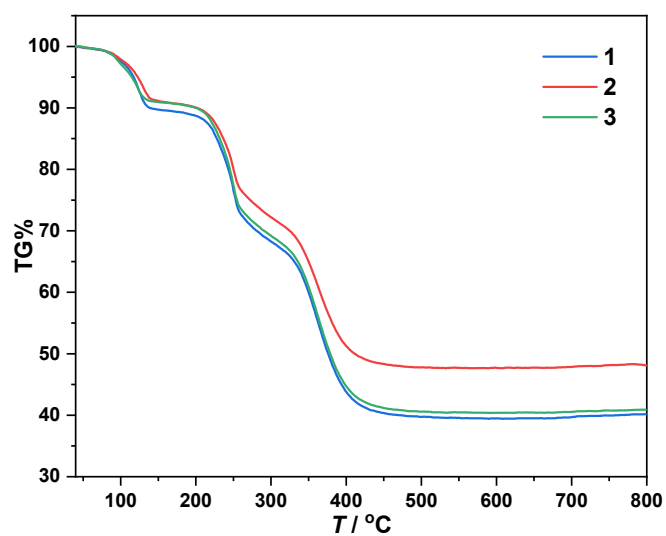

**Figure S1.** Thermogravimetric curves for 1-3.

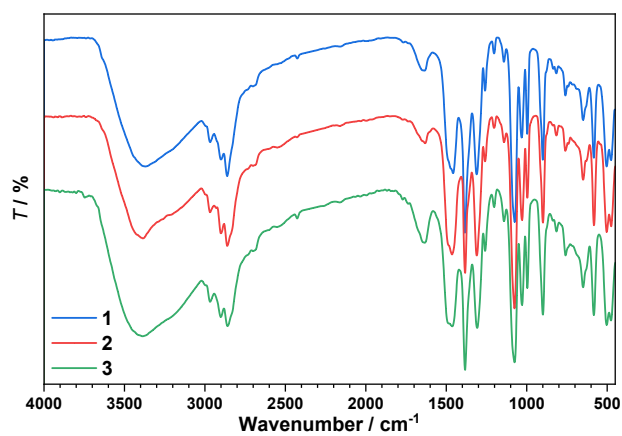

**Figure S2.** Infrared spectrum for 1-3.

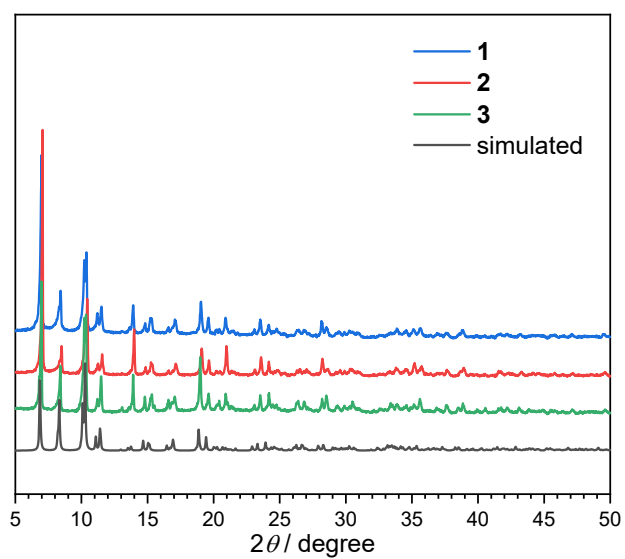

**Figure S3.** X-ray powder diffraction: measured for compounds **1-3** in comparison with that simulated from the single-crystal structure of compound **2**.

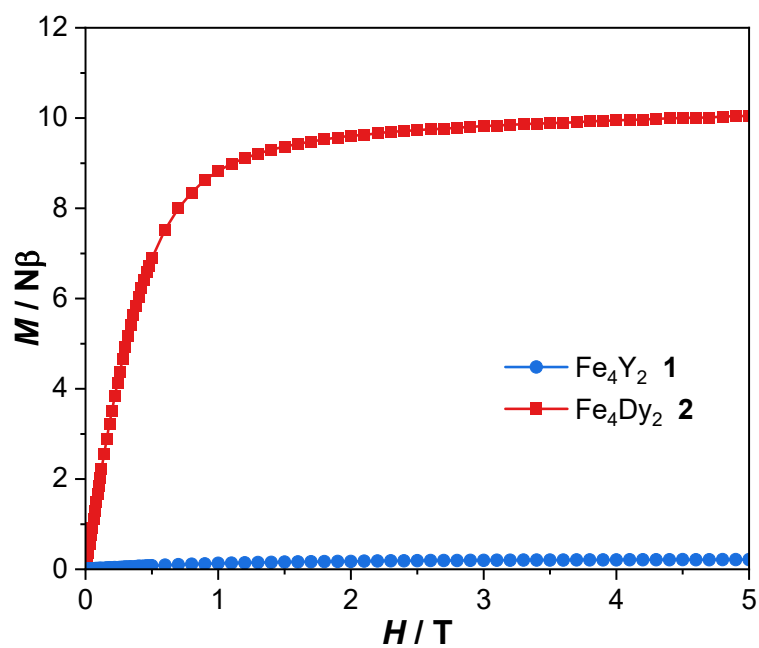

**Figure S4.** Field dependence of magnetization at 2 K for compounds **1** and **2**.



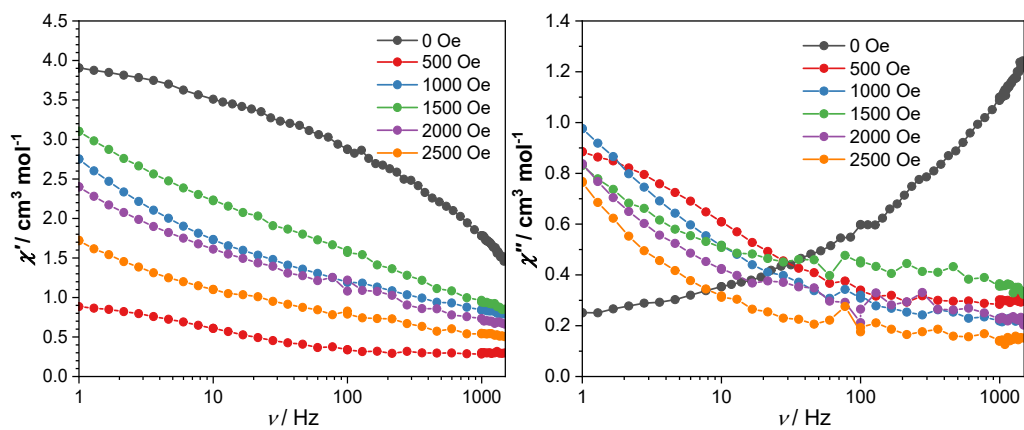

**Figure S5.** Frequency dependence of the in-phase ( $\chi'$ ) (left) and out-of-phase ( $\chi''$ ) (right) ac susceptibility component under indicated dc field at 2 K for **2**.
